# Supplementary material
Source: publisher site journal article supplement (https://static.cambridge.org/content/id/urn:cambridge.org:id:article:S0007114519003374/resource/name/S0007114519003374supp004.docx)
Supplement: Supplementary file 1 [file S0007114519003374supp004.docx]

**Search strategy in PubMed:**

1. probiotic* OR lactobacill* OR bifidobacteri* OR saccharom*
2. probiotics[MeSH Terms]
3. pregnancy[MeSH Terms]
4. Pregnan* OR gestation* OR gravida*
5. (randomized controlled trial[pt] OR controlled clinical trial[pt] OR randomized[tiab] OR placebo[tiab] OR drug therapy[sh] OR randomly[tiab] OR trial[tiab] OR groups[tiab]) NOT (animals [mh] NOT humans [mh])
6. (#1 OR #2) AND (#3 OR #4) AND #5

**Search strategy in EmBase:**

(probiotic* OR lactobacill* OR bifidobacteri* OR saccharom*) AND (Pregnan* OR gestation* OR gravida*) AND (“randomized controlled trial” OR “controlled clinical trial” OR randomized OR placebo OR drug therapy OR randomly OR trial OR groups) AND human
